# Supplementary material for: Synthesis of lipase-hydrogel microspheres and their application in deacidification of high-acid rice bran oil
Source: Royal Society of Chemistry journal article supplement (doi:10.1039/d2nj03761k), 2022-01-01
Supplement: d2nj03761k1.pdf [file d2nj03761k1.pdf]

1     **Synthesis of lipase-hydrogel microspheres and**  
2     **their application in deacidification of high-acid**  
3     **rice bran oil**

4           Yawen Yin<sup>1,2</sup>, Xu Fei\*<sup>1</sup>, Jing Tian\*<sup>2</sup>, Longquan Xu<sup>1</sup>, Yao Li\*<sup>3</sup>, Yi Wang<sup>2</sup>

5     1. *Instrumental Analysis Center, Dalian Polytechnic University, Dalian 116034, China*

6     2. *School of Biological Engineering, Dalian Polytechnic University, Dalian 116034,*  
7     *China*

8     3. *School of Light Industry and Chemical Engineering, Dalian Polytechnic University,*  
9     *Dalian 116034, China*

10    \* Correspondence to: Xu Fei, Instrumental Analysis Center, Dalian Polytechnic  
11    University, 1#Qinggongyuan Road, Dalian 116034, P. R. China

12    E-mail: [feixudlpu@163.com](mailto:feixudlpu@163.com)

13    Tel: +86-411-86323691-201

14    Fax: +86-411-86322038

15    \* Correspondence to: Jing Tian, School of Biological Engineering, Dalian Polytechnic  
16    University, 1#Qinggongyuan Road, Dalian 116034, P. R. China

17    E-mail: [tianjing@dlpu.edu.cn](mailto:tianjing@dlpu.edu.cn)

18    Tel: +86-411-86324485;

19    \* Correspondence to: Yao Li, School of Light Industry and Chemical Engineering,  
20    Dalian Polytechnic University, 1#Qinggongyuan Road, Dalian 116034, P. R. China

21    E-mail: [liyaodlpu@163.com](mailto:liyaodlpu@163.com)

## 23 2.9. Water absorption test of PHAMs

24 The 0.3 g of dried PHAM3 was uniformly dispersed on the glass plate, and  
25 PHAM3 was rewatered by means of atomizer water supply. The atomizer was placed  
26 above the plate so that the water mist could uniformly wet PHAM3. The free water that  
27 had not been absorbed by PHAM3 on the plate was wiped every 10 min and its weight  
28 was measured until the weight of PHAM3 reached equilibrium and no longer changed.  
29 The amount of water absorbed (A) was calculated by the following formula:

$$A = \frac{W_a - W_b}{m} \times 100\%$$

31  $W_a$  and  $W_b$  are the weights of PHAM3 before and after water absorption, and  $m$  was  
32 the total amount of water absorbed by PHAM3. Each result was obtained by averaging  
33 three individual experiments.

34  
35 **Table S1** The specific surface area and pore size of the PHAM3, L-PHAM3 and L-PHAM3  
36 after 10 cycles.

| Samples                 | Surface area (m <sup>2</sup> /g) | Average pore diameter (nm) |
|-------------------------|----------------------------------|----------------------------|
| PHAM3                   | 5.30                             | 14.24                      |
| L-PHAM3                 | 1.82                             | 4.01                       |
| L-PHAM3 after 10 cycles | 2.93                             | 0.01                       |

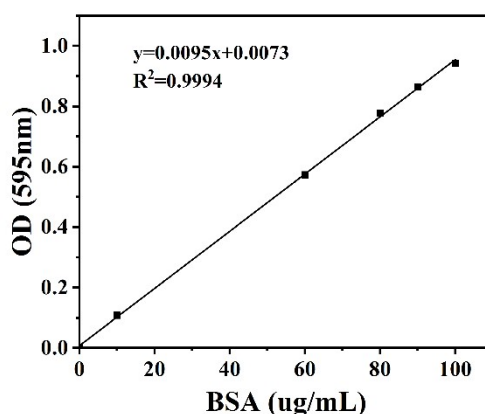

38

39

**Fig. S1** The standard curve of BSA

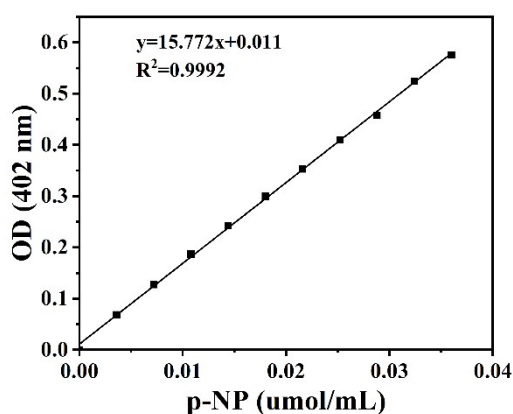

40

41

**Fig. S2** The standard curve of *p*-NP

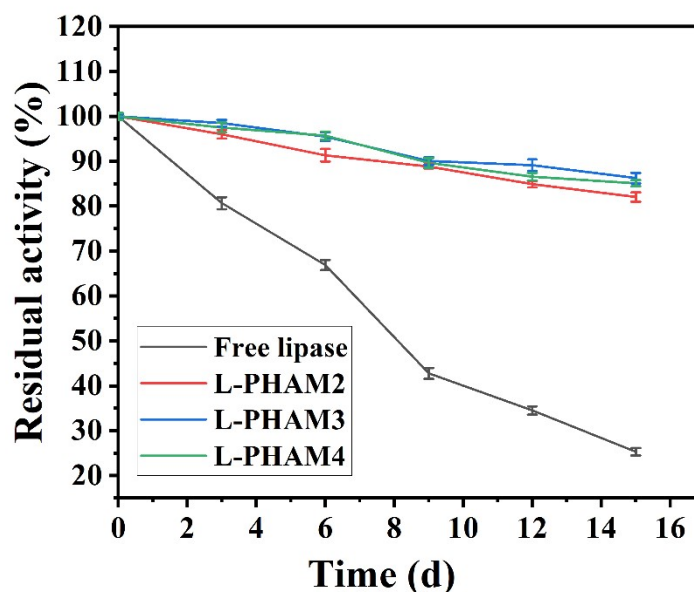

42

**Fig. S3** The storage stability of free lipase, L-PHAM2, L-PHAM3 and L-PHAM4

44

### 45 **3.5. The water absorption test of PHAMs**

46 The catalytic activity of PHAMs in a hydrophobic environment depended on the  
47 "micro-water environment" provided by controllable free water in hydrogels.  
48 Therefore, it was necessary to measure the water absorption of hydrogel microspheres.  
49 The water absorption test result of PHAM3 was shown in Fig. S4, the change of water  
50 absorption showed that PHAM3 absorbed water rapidly at first, then slowly. After  
51 about 15 min, the water absorption of PHAM3 reached about 1/3 of the total water

52 absorption rate, and after 40 min, it reached about 2/3. After 110 min, the quality of  
53 PHAM3 tended to be stable and no longer increased, and the water absorption reached  
54 saturation. The above results showed that PHAMs had excellent water absorption and  
55 could provide a controllable "micro-water environment" for the organic phase.

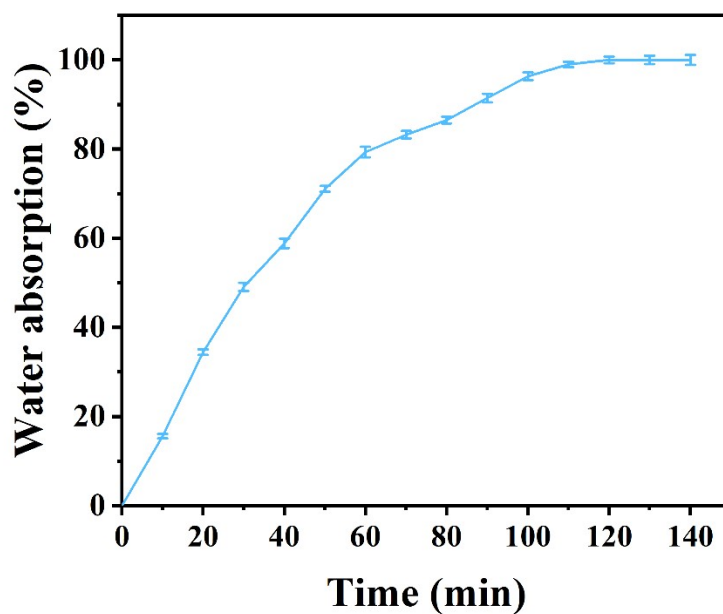

56

57

**Fig. S4** Water absorption test of PHAM3
